# Supplementary material for: Rapid and Visual Detection of Volatile Amines Based on Their Gas–Solid Reaction with Tetrachloro-p-Benzoquinone
Source: MDPI journal article supplement (doi:10.3390/molecules29081818), 2024-04-17
Supplement: s1 [file s1]

---

## Supporting Information

### Rapid and Visual Detection of Volatile Amines Based on Their Gas–Solid Reaction with Tetrachloro-p-Benzoquinone

Yue-Xiang Sun, Zi-Jian Yan, Wan-Xia Liu, Xiao-Ming Chen, Man-Hua Ding, Lin-Li Tang \* and Fei Zeng \*

---

## Contents

1.  $^1\text{H}$  NMR and  $^{13}\text{C}$  NMR Spectral of disubstituted products of TCBQ. ....3
2. Photos of TCBQ before and after exposure to different vapor amines. ...9
3. Crystal data ..... 10
4. Videos of TCBQ color change caused by n-propylamine ..... 14

# 1. $^1\text{H}$ NMR and $^{13}\text{C}$ NMR Spectral of disubstituted products of TCBQ.

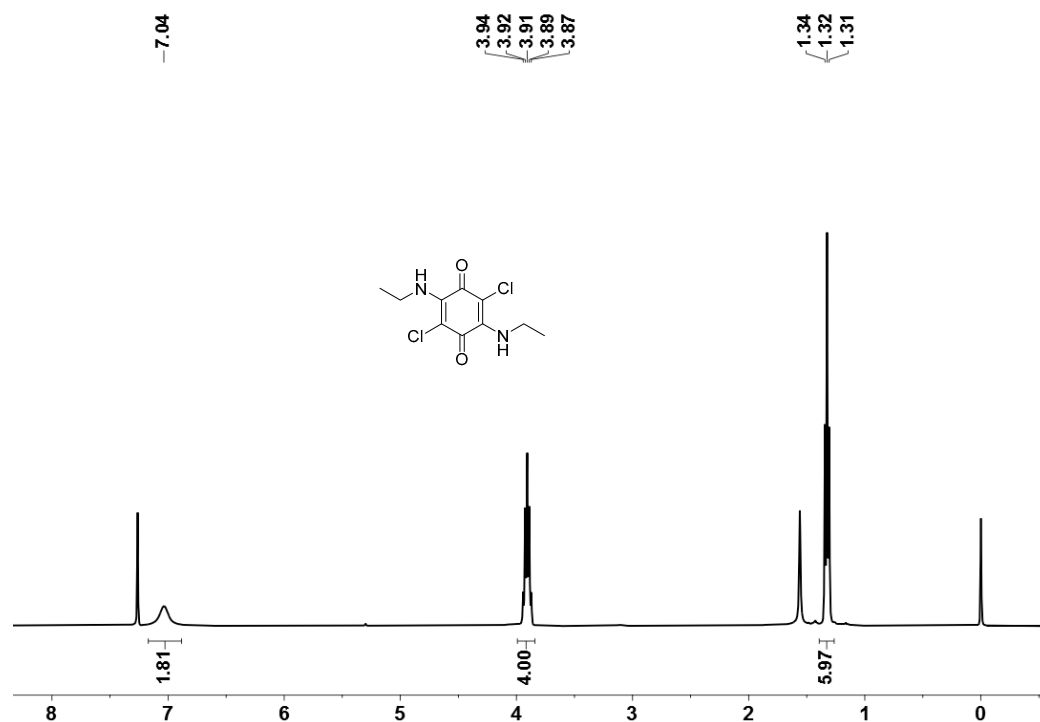

**Figure S1.**  $^1\text{H}$  NMR spectrum (400 MHz,  $\text{CDCl}_3$ , 298K) of 2,5-dichloro-3,6-bis(ethylamino)cyclohexa-2,5-diene-1,4-dione

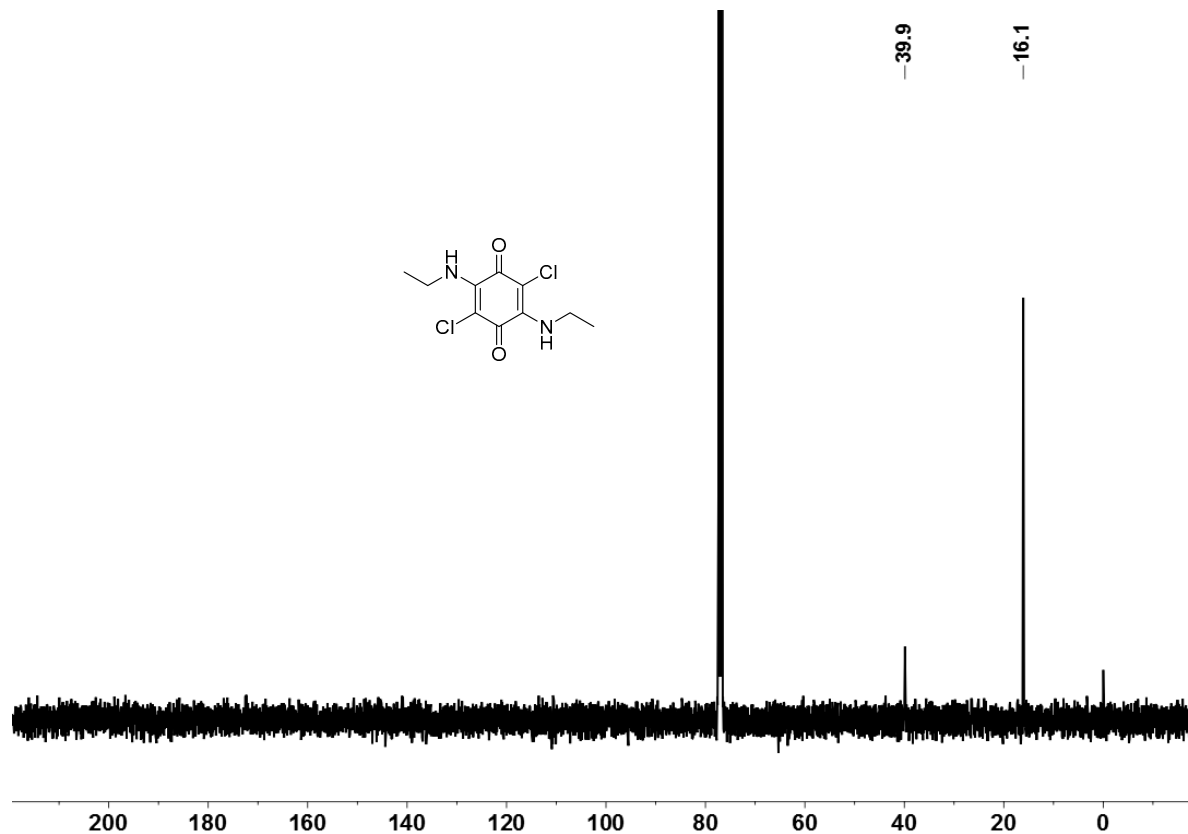

**Figure S2.**  $^{13}\text{C}$  NMR spectrum (101 MHz,  $\text{CDCl}_3$ , 298K) of 2,5-dichloro-3,6-bis(ethylamino)cyclohexa-2,5-diene-1,4-dione

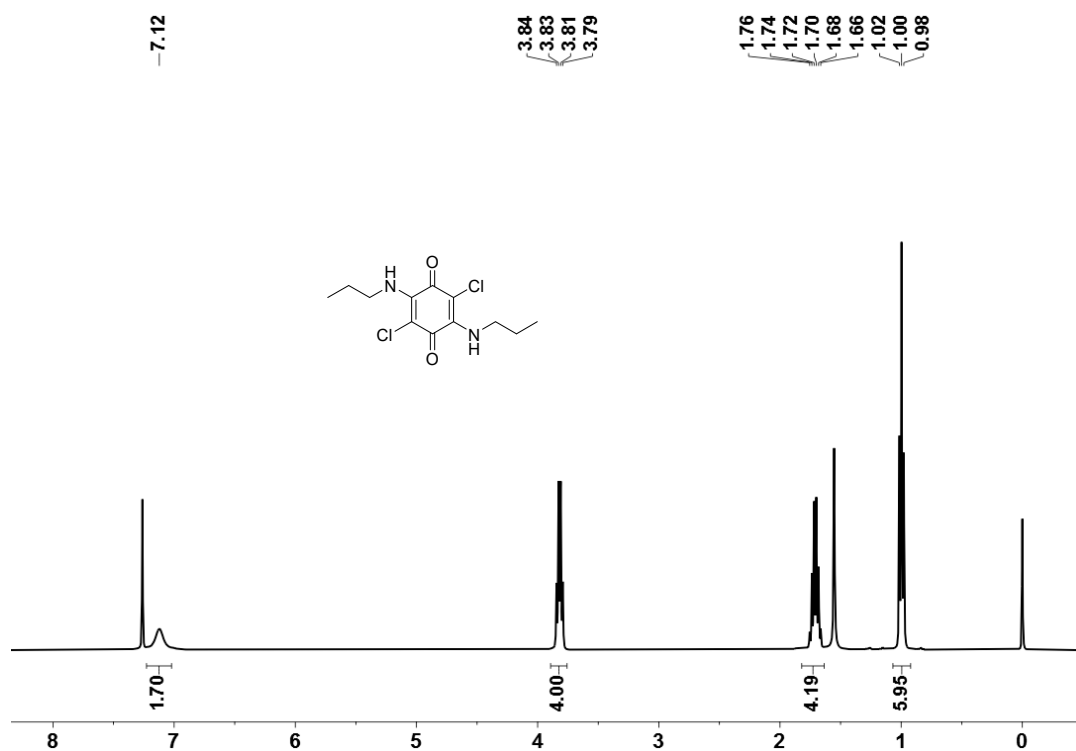

**Figure S3.** <sup>1</sup>H NMR spectrum (400 MHz, CDCl<sub>3</sub>, 298K) of 2,5-dichloro-3,6-bis(propylamino)cyclohexa-2,5-diene-1,4-dione

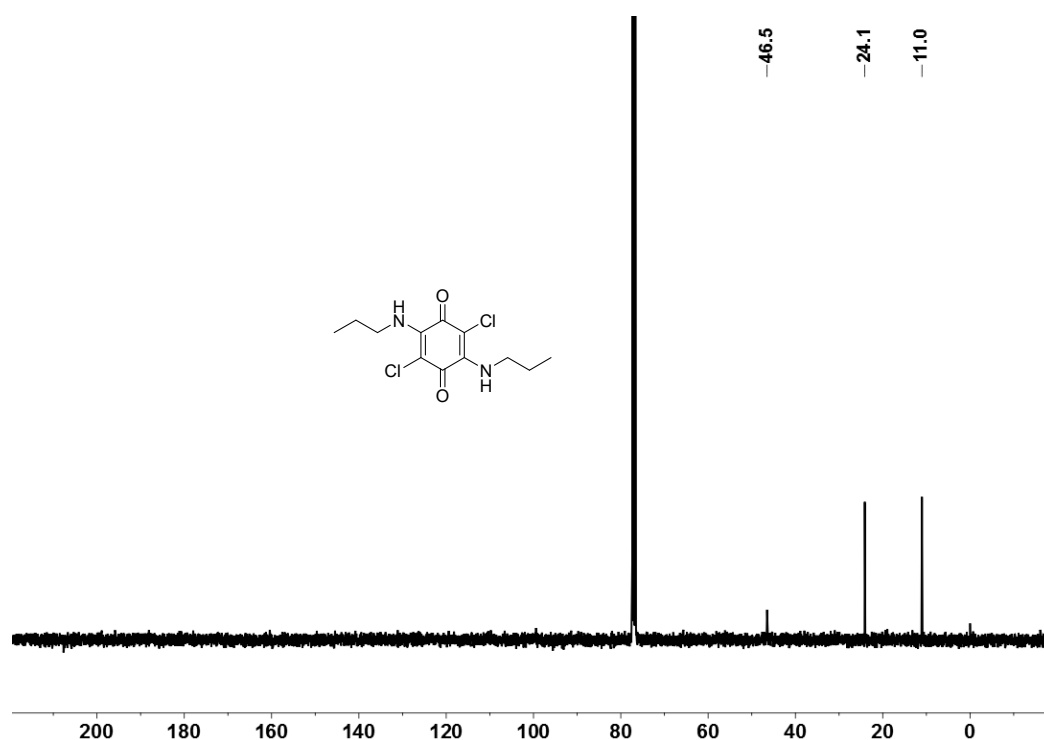

**Figure S4.** <sup>13</sup>C NMR spectrum (101 MHz, CDCl<sub>3</sub>, 298K) of 2,5-dichloro-3,6-bis(propylamino)cyclohexa-2,5-diene-1,4-dione

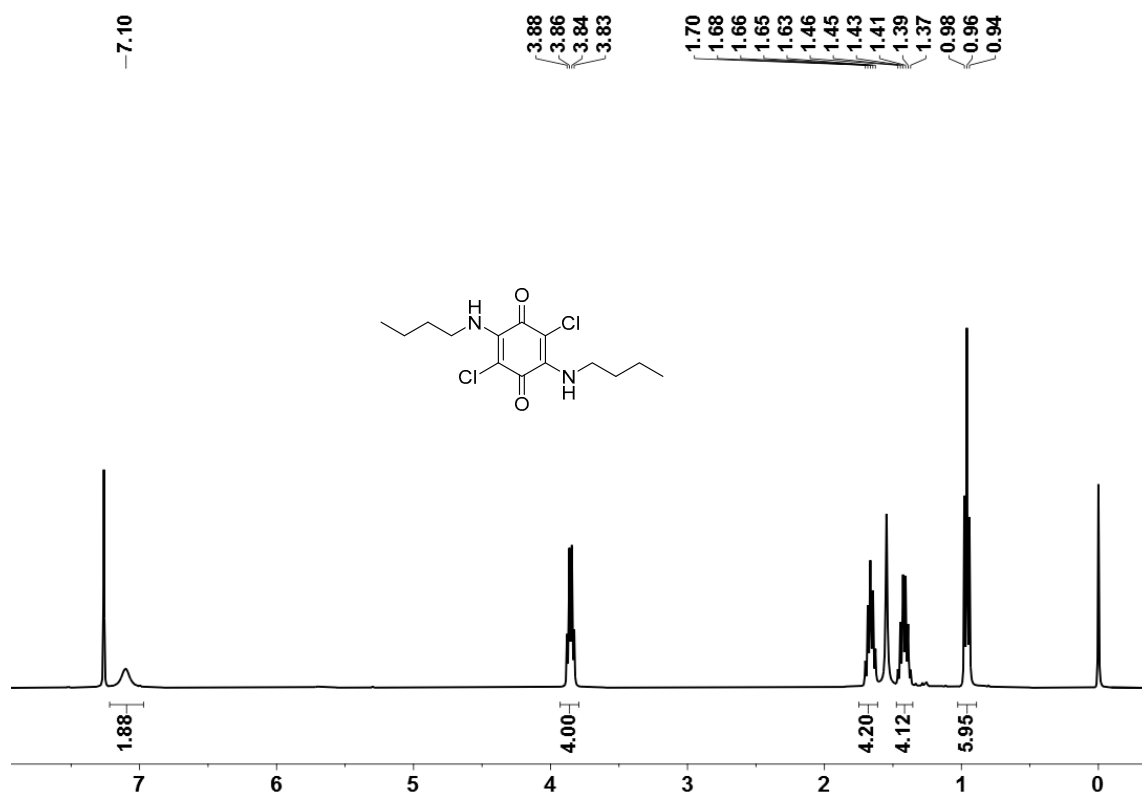

**Figure S5.** <sup>1</sup>H NMR spectrum (400 MHz, CDCl<sub>3</sub>, 298K) of 2,5-bis(butylamino)-3,6-dichlorocyclohexa-2,5-diene-1,4-dione

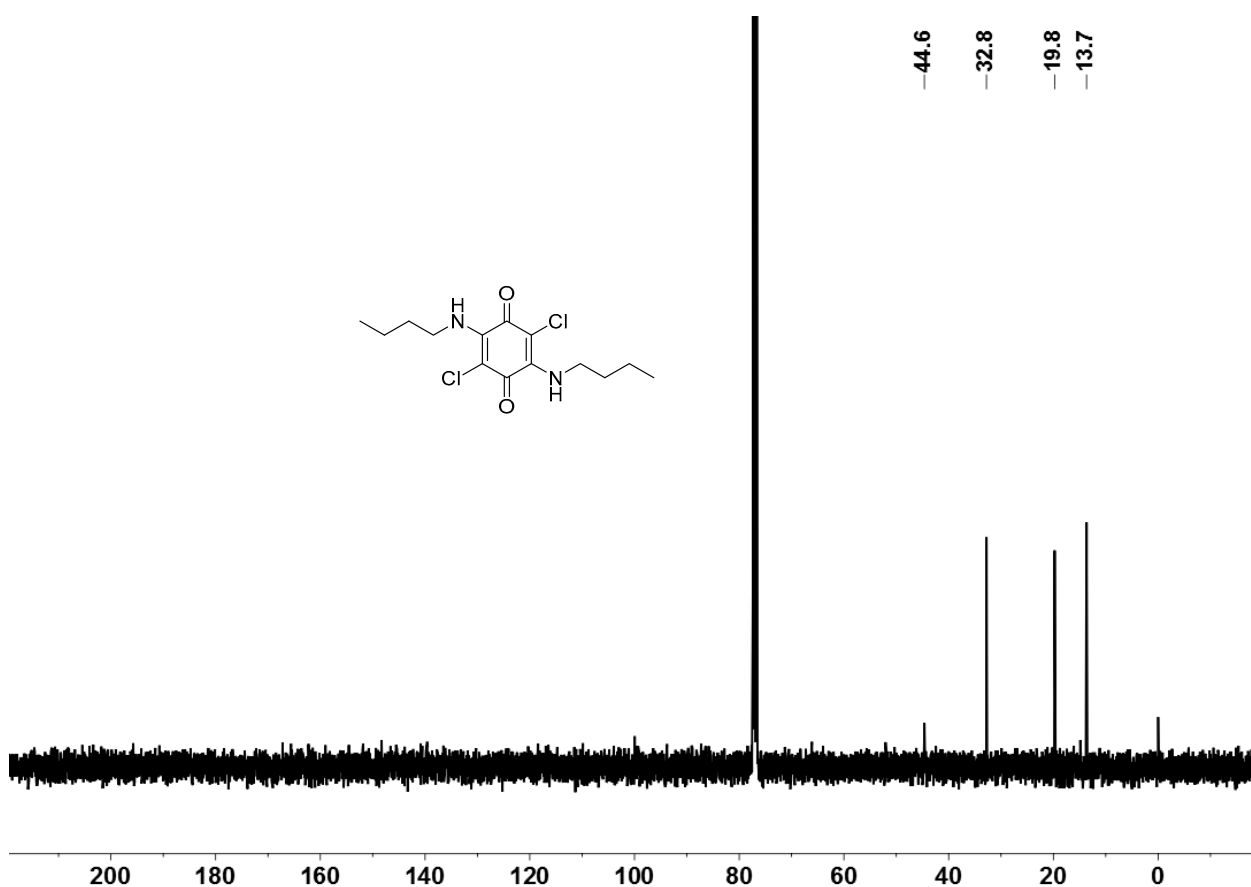

**Figure S6.** <sup>13</sup>C NMR spectrum (101 MHz, CDCl<sub>3</sub>, 298K) of 2,5-bis(butylamino)-3,6-dichlorocyclohexa-2,5-diene-1,4-dione

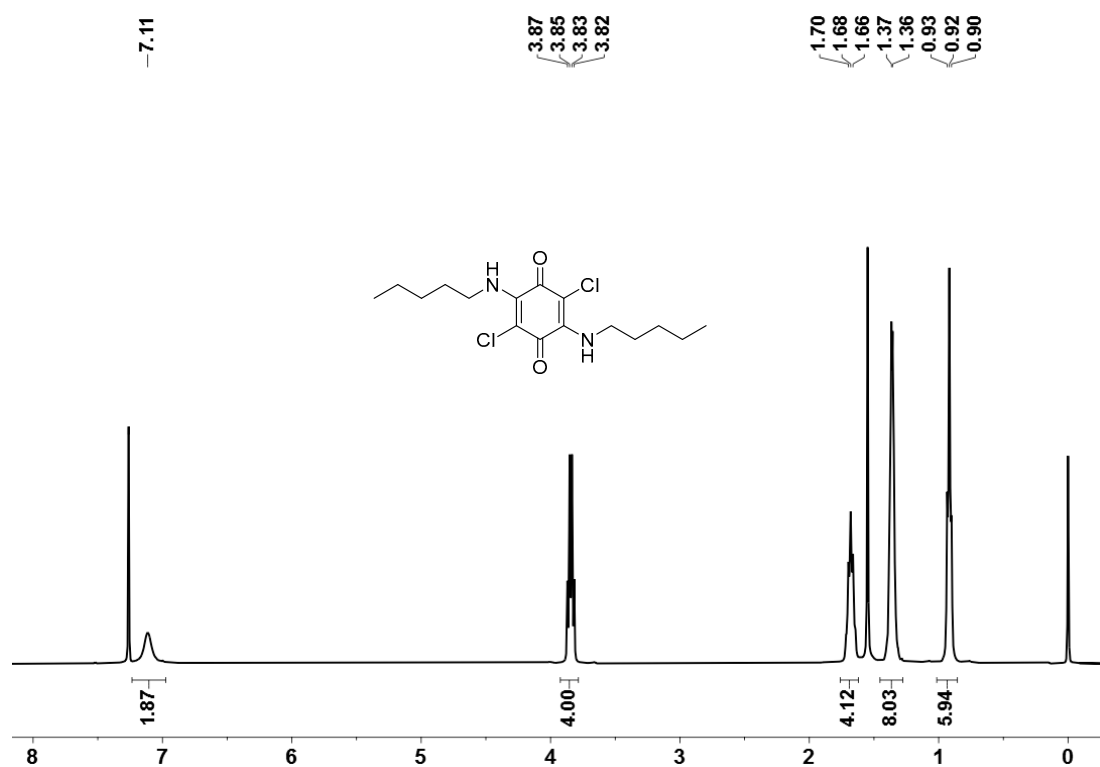

**Figure S7.** <sup>1</sup>H NMR spectrum (400 MHz, CDCl<sub>3</sub>, 298K) of 2,5-dichloro-3,6-bis(pentylamino)cyclohexa-2,5-diene-1,4-dione

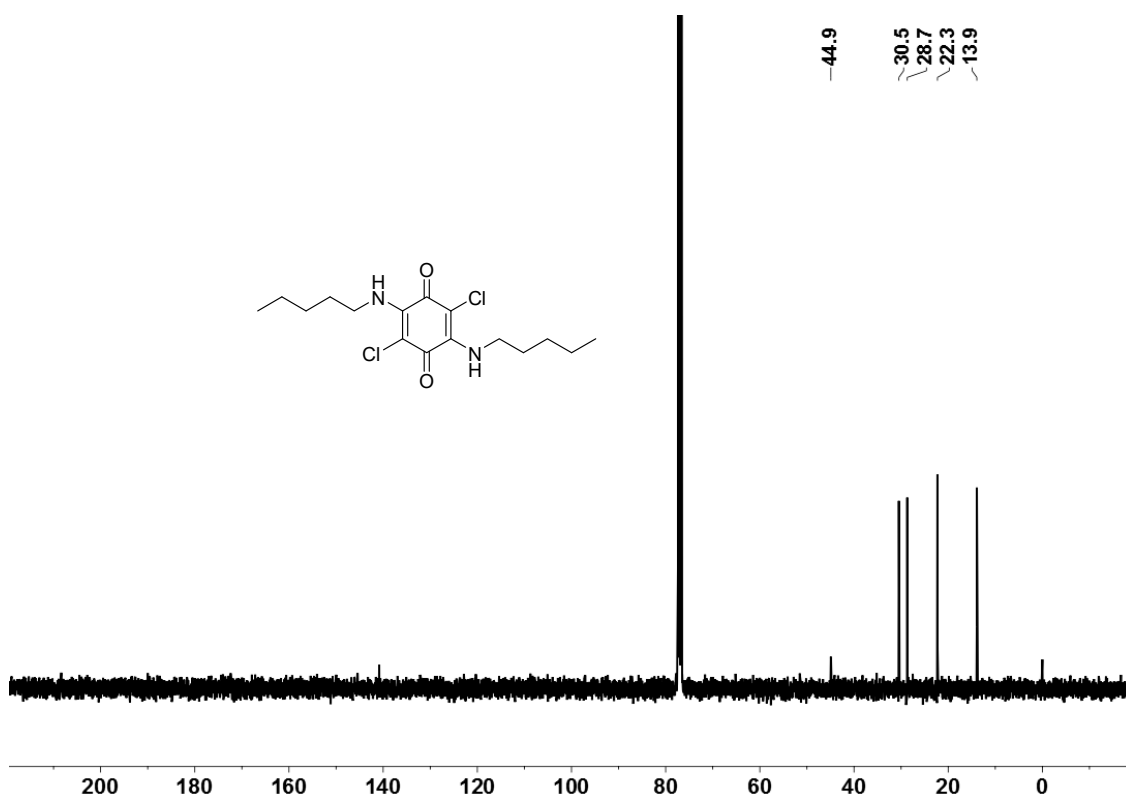

**Figure S8.** <sup>13</sup>C NMR spectrum (101 MHz, CDCl<sub>3</sub>, 298K) of 2,5-dichloro-3,6-bis(pentylamino)cyclohexa-2,5-diene-1,4-dione

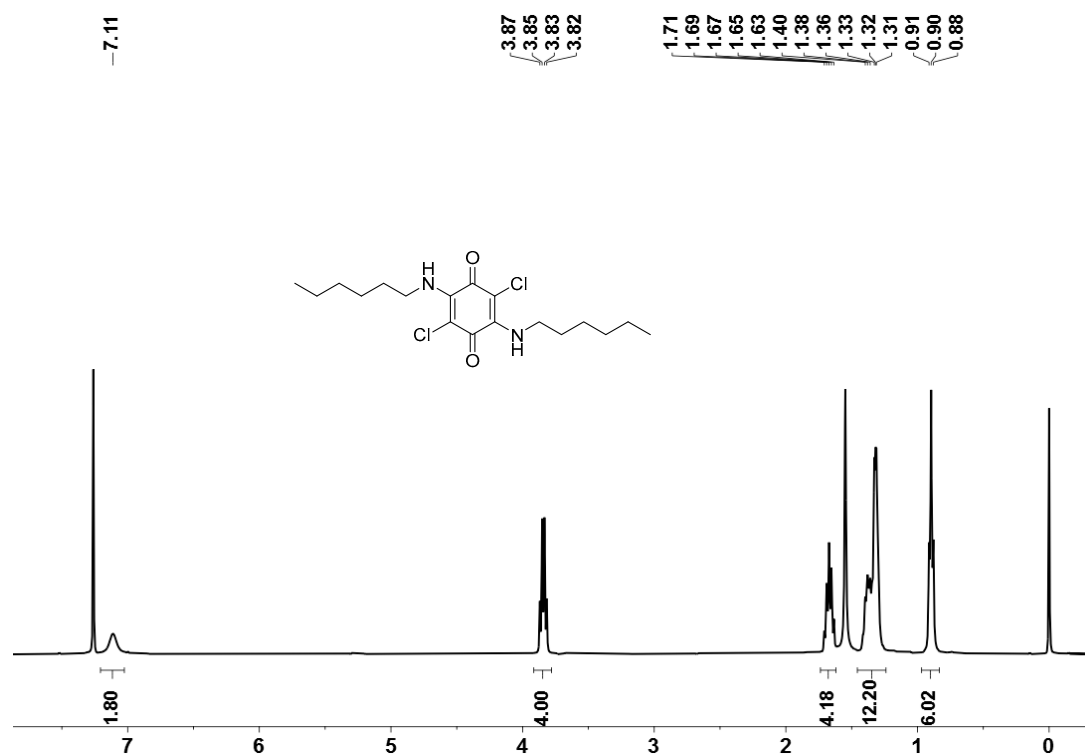

**Figure S9.** <sup>1</sup>H NMR spectrum (400 MHz, CDCl<sub>3</sub>, 298K) of 2,5-dichloro-3,6-bis(hexylamino)cyclohexa-2,5-diene-1,4-dione

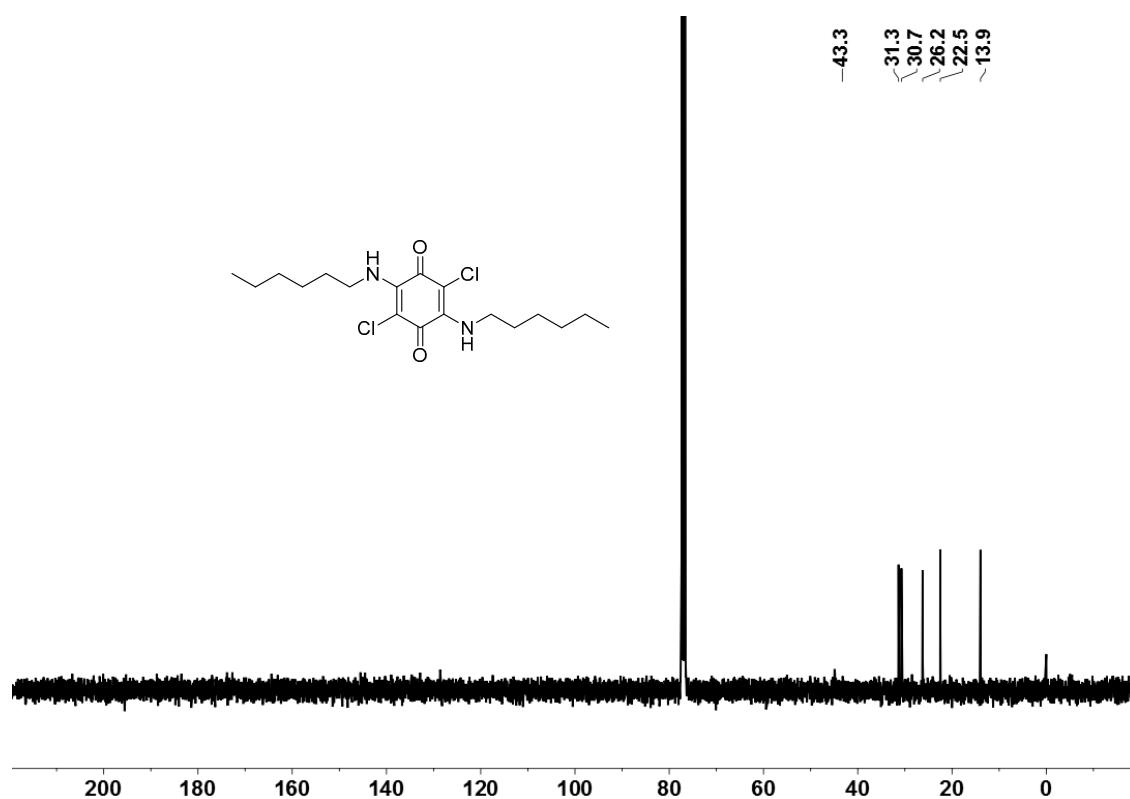

**Figure S10.** <sup>13</sup>C NMR spectrum (101 MHz, CDCl<sub>3</sub>, 298K) of 2,5-dichloro-3,6-bis(hexylamino)cyclohexa-2,5-diene-1,4-dione

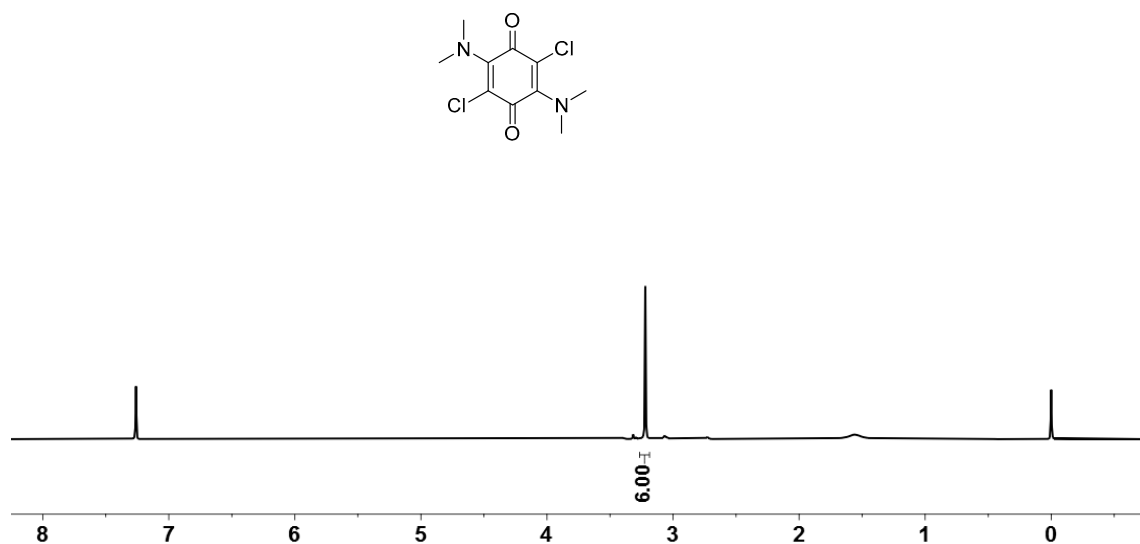

**Figure S11.** <sup>1</sup>H NMR spectrum (400 MHz, CDCl<sub>3</sub>, 298K) of 2,5-dichloro-3,6-bis(dimethylamino)cyclohexa-2,5-diene-1,4-dione

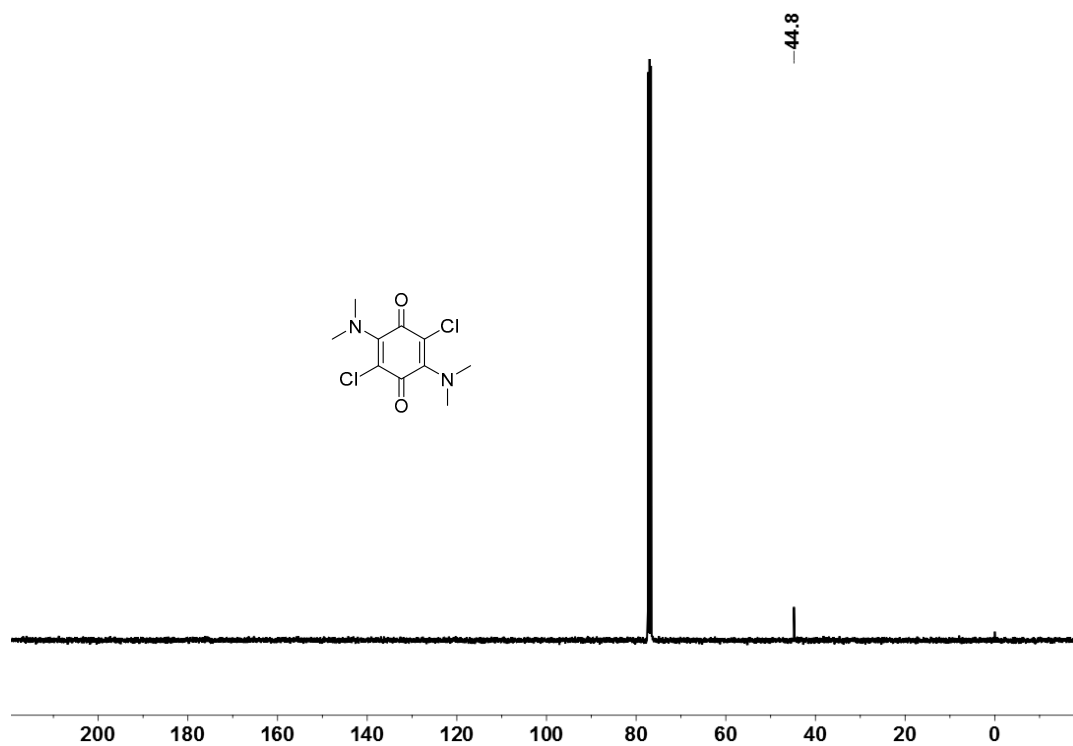

**Figure S12.** <sup>13</sup>C NMR spectrum (101 MHz, CDCl<sub>3</sub>, 298K) of 2,5-dichloro-3,6-bis(dimethylamino)cyclohexa-2,5-diene-1,4-dione

UV-vis spectral of 1 and DDQ Photos of TCBQ before and after exposure to different vapor amines.



## 2. Photos of TCBQ before and after exposure to different vapor amines.

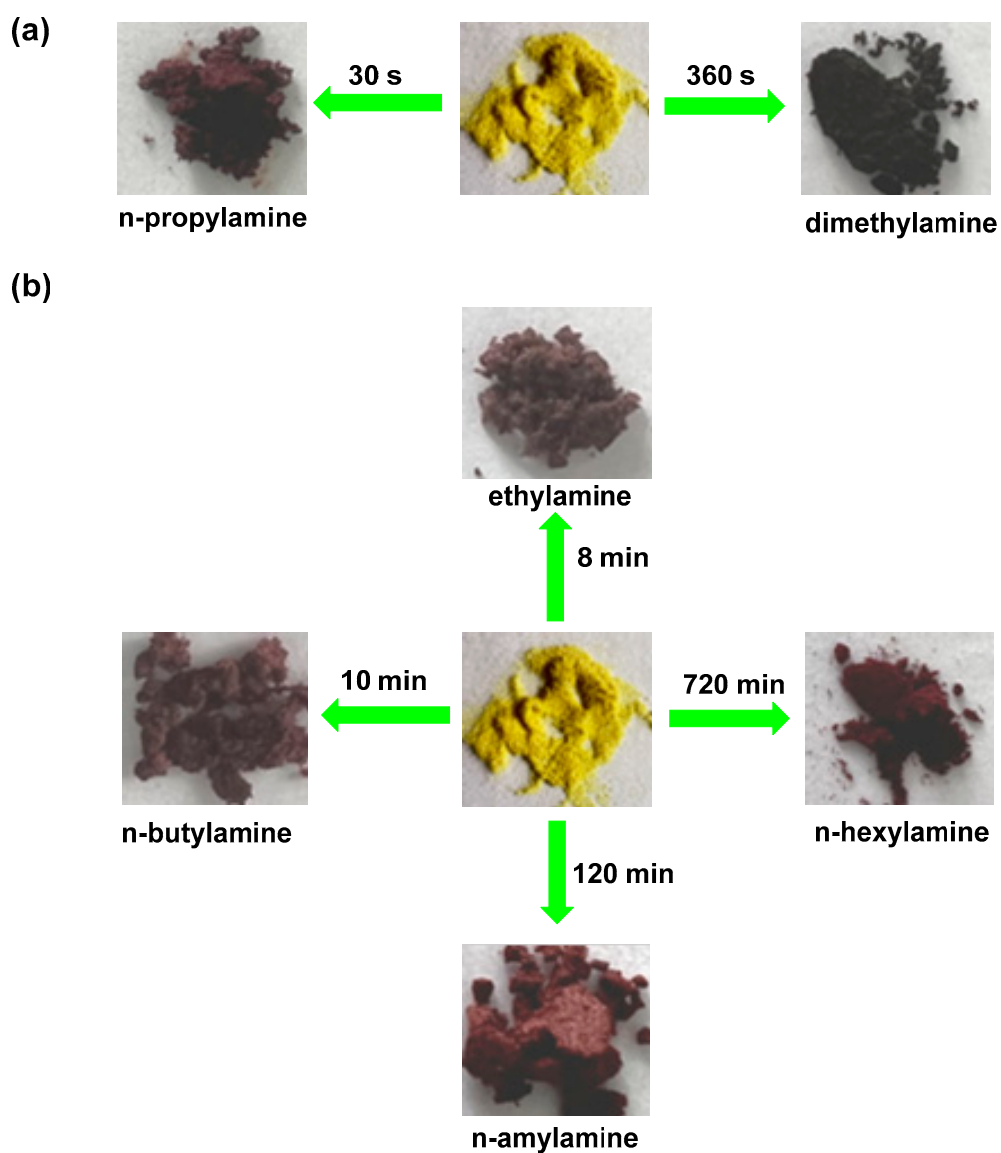

**Figure S13.** Photos of TCBQ before and after exposure to different vapor amines at different times.

---

### 3. Crystal data

#### Crystal data and structure refinement for TCBQ+C2.

|                                             |                                                                               |
|---------------------------------------------|-------------------------------------------------------------------------------|
| Identification code                         | TCBQ+C2                                                                       |
| Empirical formula                           | C <sub>10</sub> H <sub>12</sub> Cl <sub>2</sub> N <sub>2</sub> O <sub>2</sub> |
| Formula weight                              | 263.12                                                                        |
| Temperature/K                               | 296.15                                                                        |
| Crystal system                              | triclinic                                                                     |
| Space group                                 | P-1                                                                           |
| a/Å                                         | 4.752(4)                                                                      |
| b/Å                                         | 7.553(6)                                                                      |
| c/Å                                         | 8.500(6)                                                                      |
| $\alpha$ /°                                 | 99.595(9)                                                                     |
| $\beta$ /°                                  | 92.056(9)                                                                     |
| $\gamma$ /°                                 | 105.923(9)                                                                    |
| Volume/Å <sup>3</sup>                       | 288.2(4)                                                                      |
| Z                                           | 1                                                                             |
| $\rho_{\text{calc}}/\text{cm}^3$            | 1.516                                                                         |
| $\mu/\text{mm}^{-1}$                        | 0.549                                                                         |
| F(000)                                      | 136.0                                                                         |
| Crystal size/mm <sup>3</sup>                | 0.2 × 0.1 × 0.1                                                               |
| Radiation                                   | MoK $\alpha$ ( $\lambda$ = 0.71073)                                           |
| 2 $\Theta$ range for data collection/°      | 4.878 to 54.988                                                               |
| Index ranges                                | -6 ≤ h ≤ 6, -9 ≤ k ≤ 9, -10 ≤ l ≤ 10                                          |
| Reflections collected                       | 3207                                                                          |
| Independent reflections                     | 1271 [ $R_{\text{int}}$ = 0.0219, $R_{\text{sigma}}$ = 0.0315]                |
| Data/restraints/parameters                  | 1271/0/97                                                                     |
| Goodness-of-fit on F <sup>2</sup>           | 1.068                                                                         |
| Final R indexes [ $I \geq 2\sigma(I)$ ]     | $R_1$ = 0.0390, $wR_2$ = 0.0926                                               |
| Final R indexes [all data]                  | $R_1$ = 0.0530, $wR_2$ = 0.0987                                               |
| Largest diff. peak/hole / e Å <sup>-3</sup> | 0.33/-0.19                                                                    |

---

**Crystal data and structure refinement for TCBQ+C3.**

|                                             |                                                                               |
|---------------------------------------------|-------------------------------------------------------------------------------|
| Identification code                         | TCBQ+C3                                                                       |
| Empirical formula                           | C <sub>12</sub> H <sub>16</sub> Cl <sub>2</sub> N <sub>2</sub> O <sub>2</sub> |
| Formula weight                              | 291.17                                                                        |
| Temperature/K                               | 296.15                                                                        |
| Crystal system                              | triclinic                                                                     |
| Space group                                 | P-1                                                                           |
| a/Å                                         | 4.765(3)                                                                      |
| b/Å                                         | 7.470(4)                                                                      |
| c/Å                                         | 10.096(5)                                                                     |
| $\alpha$ /°                                 | 77.250(5)                                                                     |
| $\beta$ /°                                  | 78.671(6)                                                                     |
| $\gamma$ /°                                 | 86.462(6)                                                                     |
| Volume/Å <sup>3</sup>                       | 343.6(3)                                                                      |
| Z                                           | 1                                                                             |
| $\rho_{\text{calc}}/\text{cm}^3$            | 1.407                                                                         |
| $\mu/\text{mm}^{-1}$                        | 0.468                                                                         |
| F(000)                                      | 152.0                                                                         |
| Crystal size/mm <sup>3</sup>                | 0.2 × 0.2 × 0.1                                                               |
| Radiation                                   | MoK $\alpha$ ( $\lambda$ = 0.71073)                                           |
| 2 $\Theta$ range for data collection/°      | 4.212 to 54.98                                                                |
| Index ranges                                | -6 ≤ h ≤ 6, -9 ≤ k ≤ 9, -12 ≤ l ≤ 13                                          |
| Reflections collected                       | 3814                                                                          |
| Independent reflections                     | 1522 [ $R_{\text{int}}$ = 0.0149, $R_{\text{sigma}}$ = 0.0185]                |
| Data/restraints/parameters                  | 1522/0/114                                                                    |
| Goodness-of-fit on F <sup>2</sup>           | 1.029                                                                         |
| Final R indexes [ $I \geq 2\sigma(I)$ ]     | $R_1$ = 0.0394, $wR_2$ = 0.1055                                               |
| Final R indexes [all data]                  | $R_1$ = 0.0490, $wR_2$ = 0.1123                                               |
| Largest diff. peak/hole / e Å <sup>-3</sup> | 0.39/-0.14                                                                    |

---

**Crystal data and structure refinement for TCBQ+C4.**

|                                             |                                                                               |
|---------------------------------------------|-------------------------------------------------------------------------------|
| Identification code                         | TCBQ+C4                                                                       |
| Empirical formula                           | C <sub>14</sub> H <sub>20</sub> Cl <sub>2</sub> N <sub>2</sub> O <sub>2</sub> |
| Formula weight                              | 319.22                                                                        |
| Temperature/K                               | 296.15                                                                        |
| Crystal system                              | monoclinic                                                                    |
| Space group                                 | P2 <sub>1</sub> /n                                                            |
| a/Å                                         | 7.426(6)                                                                      |
| b/Å                                         | 4.668(4)                                                                      |
| c/Å                                         | 22.114(19)                                                                    |
| $\alpha$ /°                                 | 90                                                                            |
| $\beta$ /°                                  | 93.448(11)                                                                    |
| $\gamma$ /°                                 | 90                                                                            |
| Volume/Å <sup>3</sup>                       | 765.1(12)                                                                     |
| Z                                           | 2                                                                             |
| $\rho_{\text{calc}}/\text{cm}^3$            | 1.386                                                                         |
| $\mu/\text{mm}^{-1}$                        | 0.427                                                                         |
| F(000)                                      | 336.0                                                                         |
| Crystal size/mm <sup>3</sup>                | 0.45 × 0.42 × 0.21                                                            |
| Radiation                                   | MoK $\alpha$ ( $\lambda$ = 0.71073)                                           |
| 2 $\Theta$ range for data collection/°      | 3.69 to 49.956                                                                |
| Index ranges                                | -8 ≤ h ≤ 8, -5 ≤ k ≤ 5, -26 ≤ l ≤ 26                                          |
| Reflections collected                       | 5100                                                                          |
| Independent reflections                     | 1302 [ $R_{\text{int}}$ = 0.0788, $R_{\text{sigma}}$ = 0.0763]                |
| Data/restraints/parameters                  | 1302/0/92                                                                     |
| Goodness-of-fit on F <sup>2</sup>           | 1.157                                                                         |
| Final R indexes [ $I \geq 2\sigma(I)$ ]     | $R_1$ = 0.0788, $wR_2$ = 0.1501                                               |
| Final R indexes [all data]                  | $R_1$ = 0.1273, $wR_2$ = 0.1639                                               |
| Largest diff. peak/hole / e Å <sup>-3</sup> | 0.34/-0.25                                                                    |

---

**Crystal data and structure refinement for TCBQ+C5.**

|                                             |                                                                               |
|---------------------------------------------|-------------------------------------------------------------------------------|
| Identification code                         | TCBQ+C5                                                                       |
| Empirical formula                           | C <sub>16</sub> H <sub>24</sub> Cl <sub>2</sub> N <sub>2</sub> O <sub>2</sub> |
| Formula weight                              | 347.27                                                                        |
| Temperature/K                               | 296.15                                                                        |
| Crystal system                              | triclinic                                                                     |
| Space group                                 | P-1                                                                           |
| a/Å                                         | 4.7504(16)                                                                    |
| b/Å                                         | 7.487(3)                                                                      |
| c/Å                                         | 12.737(4)                                                                     |
| $\alpha$ /°                                 | 104.371(3)                                                                    |
| $\beta$ /°                                  | 97.697(4)                                                                     |
| $\gamma$ /°                                 | 91.279(4)                                                                     |
| Volume/Å <sup>3</sup>                       | 434.2(3)                                                                      |
| Z                                           | 1                                                                             |
| $\rho_{\text{calc}}/\text{cm}^3$            | 1.328                                                                         |
| $\mu/\text{mm}^{-1}$                        | 0.382                                                                         |
| F(000)                                      | 184.0                                                                         |
| Crystal size/mm <sup>3</sup>                | 0.2 × 0.2 × 0.1                                                               |
| Radiation                                   | MoK $\alpha$ ( $\lambda$ = 0.71073)                                           |
| 2 $\Theta$ range for data collection/°      | 3.336 to 54.994                                                               |
| Index ranges                                | -6 ≤ h ≤ 6, -9 ≤ k ≤ 9, -16 ≤ l ≤ 16                                          |
| Reflections collected                       | 4789                                                                          |
| Independent reflections                     | 1930 [ $R_{\text{int}}$ = 0.0175, $R_{\text{sigma}}$ = 0.0234]                |
| Data/restraints/parameters                  | 1930/0/148                                                                    |
| Goodness-of-fit on F <sup>2</sup>           | 1.069                                                                         |
| Final R indexes [ $I \geq 2\sigma(I)$ ]     | $R_1$ = 0.0373, $wR_2$ = 0.0948                                               |
| Final R indexes [all data]                  | $R_1$ = 0.0506, $wR_2$ = 0.1002                                               |
| Largest diff. peak/hole / e Å <sup>-3</sup> | 0.20/-0.17                                                                    |

---

### Crystal data and structure refinement for TCBQ+C6.

|                                                |                                                                |
|------------------------------------------------|----------------------------------------------------------------|
| Identification code                            | TCBQ+C6                                                        |
| Empirical formula                              | C <sub>9</sub> H <sub>14</sub> ClNO                            |
| Formula weight                                 | 187.66                                                         |
| Temperature/K                                  | 296.15                                                         |
| Crystal system                                 | triclinic                                                      |
| Space group                                    | P-1                                                            |
| a/Å                                            | 4.722(15)                                                      |
| b/Å                                            | 7.40(2)                                                        |
| c/Å                                            | 14.97(5)                                                       |
| $\alpha/^\circ$                                | 91.92(4)                                                       |
| $\beta/^\circ$                                 | 97.45(3)                                                       |
| $\gamma/^\circ$                                | 107.18(3)                                                      |
| Volume/Å <sup>3</sup>                          | 494(3)                                                         |
| Z                                              | 2                                                              |
| $\rho_{\text{calc}}/\text{cm}^3$               | 1.262                                                          |
| $\mu/\text{mm}^{-1}$                           | 0.341                                                          |
| F(000)                                         | 200.0                                                          |
| Crystal size/mm <sup>3</sup>                   | 0.2 × 0.2 × 0.1                                                |
| Radiation                                      | MoK $\alpha$ ( $\lambda$ = 0.71073)                            |
| 2 $\theta$ range for data collection/ $^\circ$ | 2.752 to 49.998                                                |
| Index ranges                                   | -5 ≤ h ≤ 5, -8 ≤ k ≤ 8, -17 ≤ l ≤ 17                           |
| Reflections collected                          | 3331                                                           |
| Independent reflections                        | 1712 [ $R_{\text{int}}$ = 0.0259, $R_{\text{sigma}}$ = 0.0457] |
| Data/restraints/parameters                     | 1712/0/110                                                     |
| Goodness-of-fit on F <sup>2</sup>              | 1.140                                                          |
| Final R indexes [ $I \geq 2\sigma(I)$ ]        | $R_1$ = 0.0780, $wR_2$ = 0.2221                                |
| Final R indexes [all data]                     | $R_1$ = 0.0975, $wR_2$ = 0.2332                                |
| Largest diff. peak/hole / e Å <sup>-3</sup>    | 0.38/-0.27                                                     |

### 4. Videos of TCBQ color change caused by n-propylamine

#### Solid of TCBQ

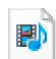

solid.mp4

#### Test paper prepared by TCBQ

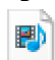

test paper.mp4
